# Supplementary material
Source: PubMed Central journal article supplement (PMC10263190)

eFigure 1. Flow chart of target trials of antibiotic initiation at each week, 24-36 weeks' gestation

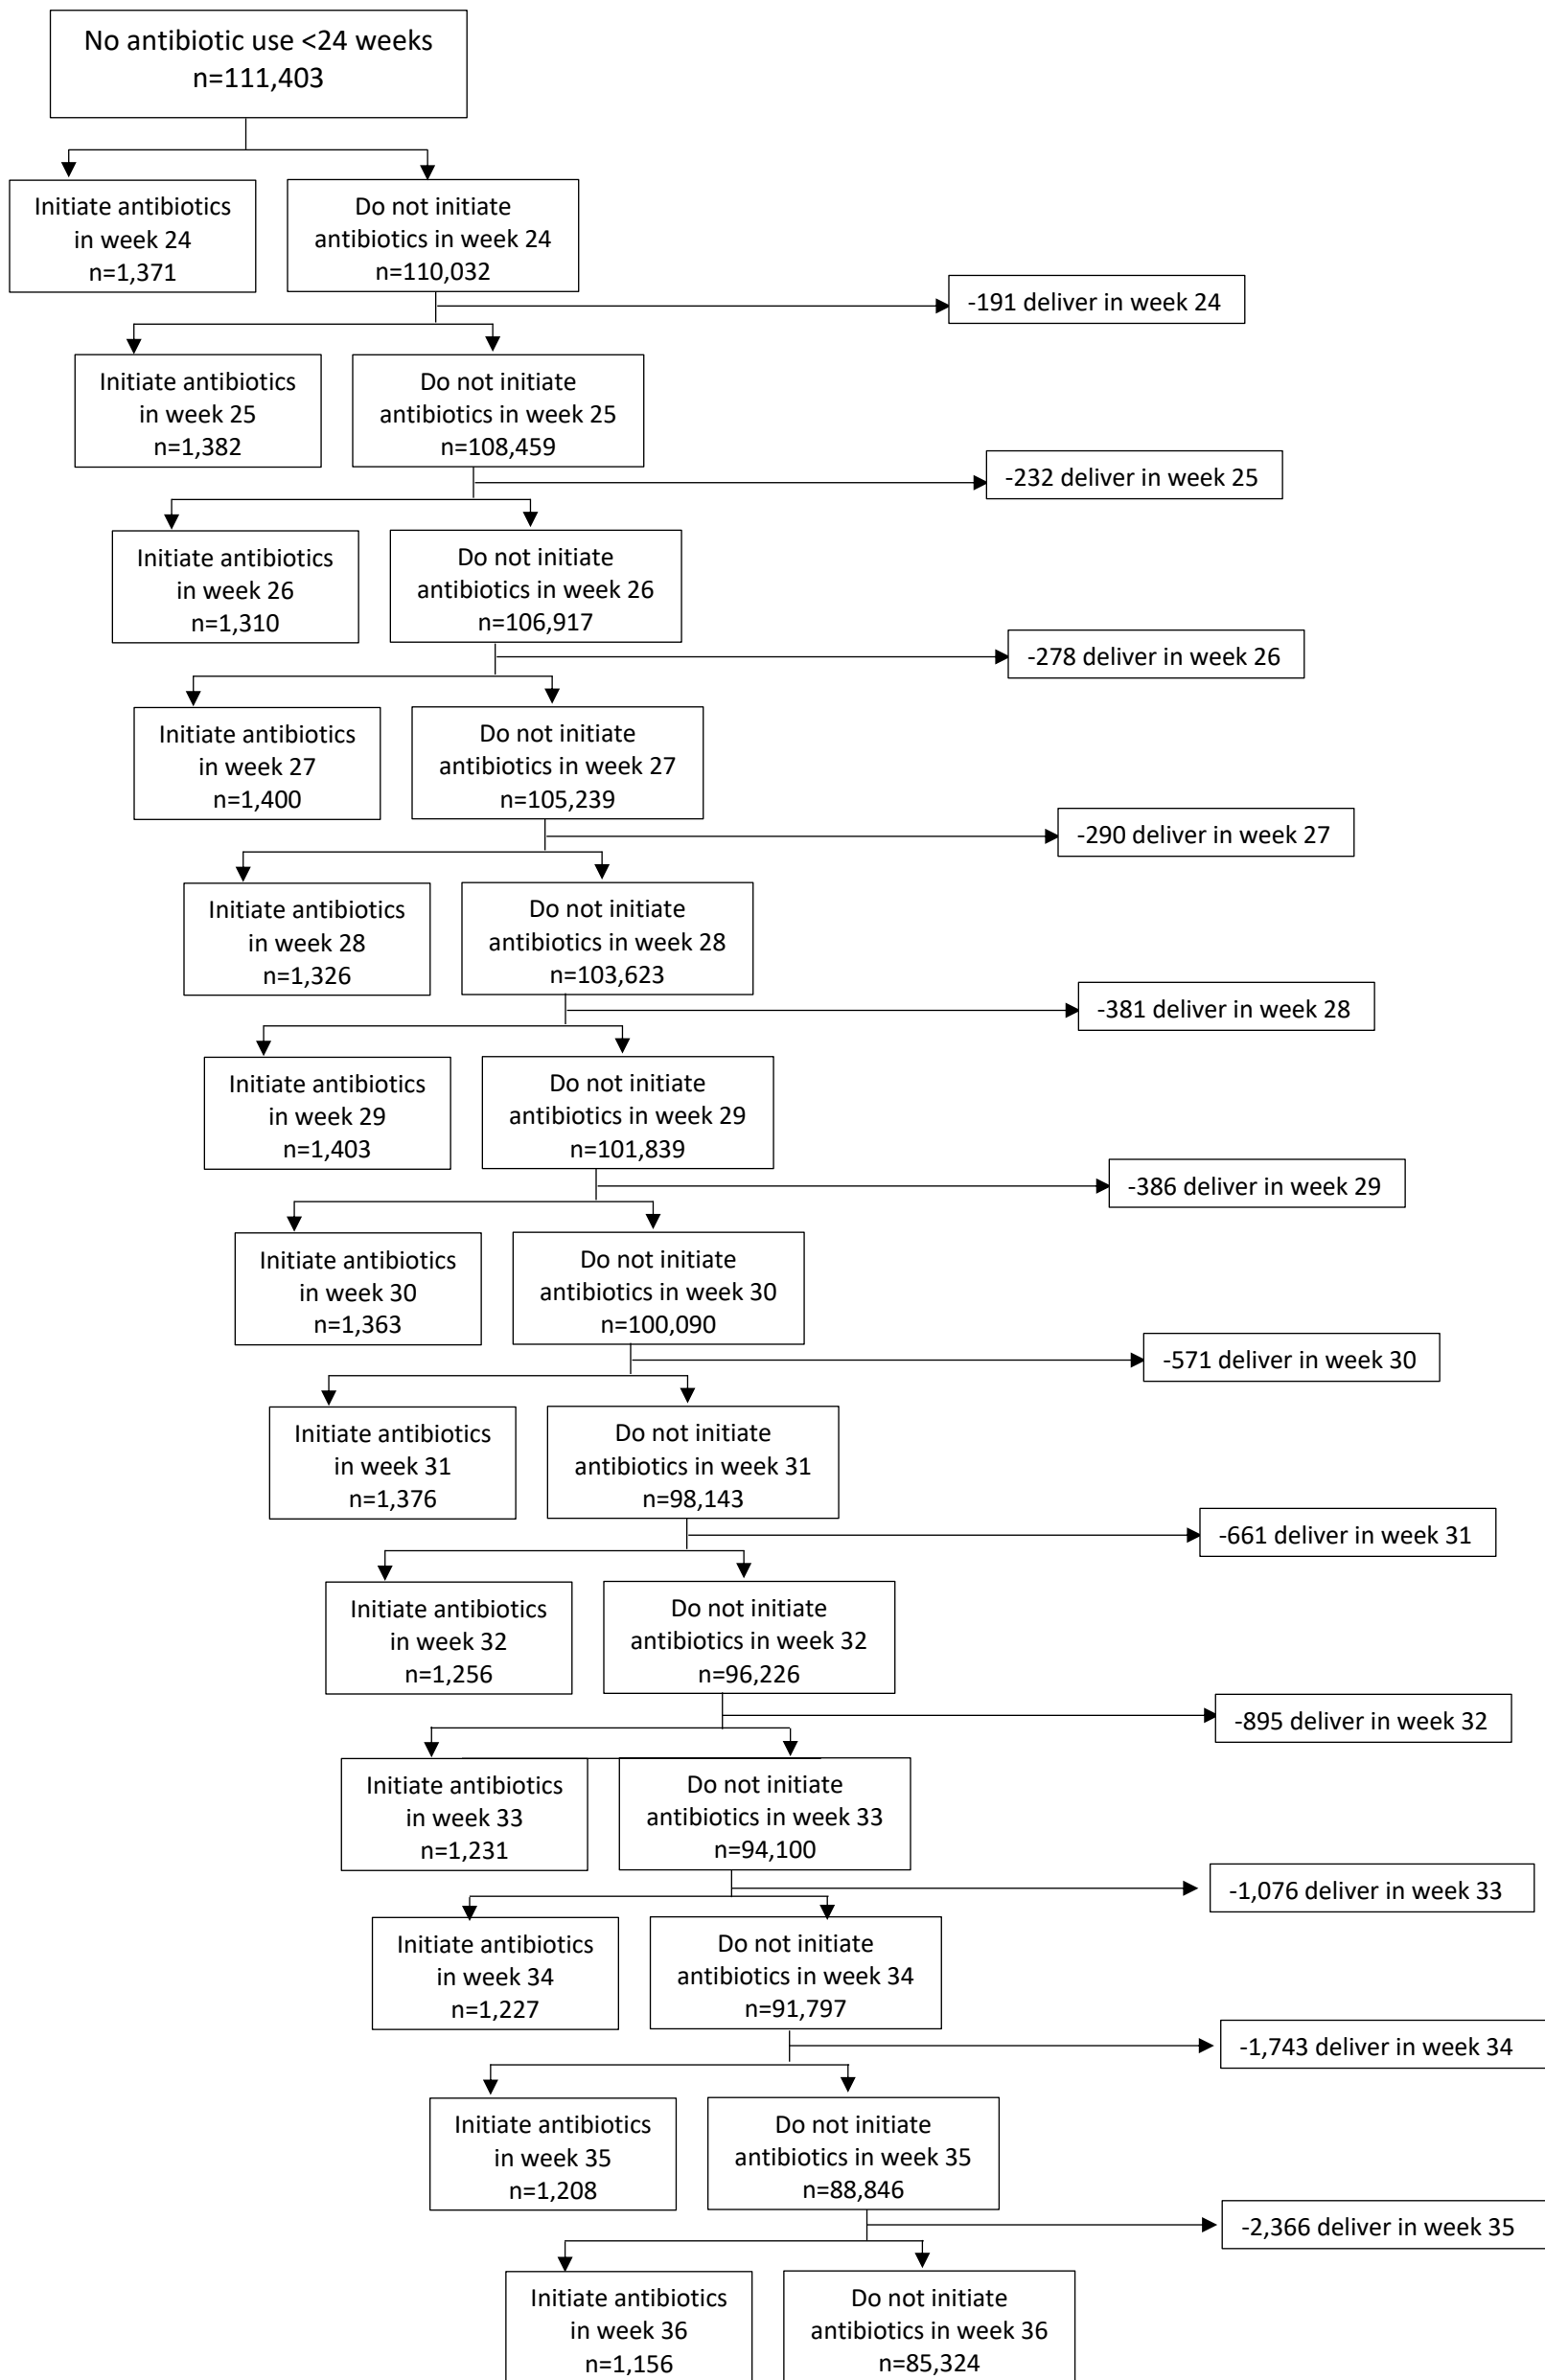

Supplement: NIHMS1871258-supplement-eFigure_1.pdf [file NIHMS1871258-supplement-eFigure_1.pdf]
